# Supplementary material for: A rapid method for species-level identification of Bacillus subtilis group strains via multiplex pan-genome-based PCR
Source: Research Square preprint supplement (doi:10.21203/rs.3.rs-7088511/v1), 2025-10-02
Supplement: Supplementary file 1 [file 5f745d28f815fab41a739dcb.docx]

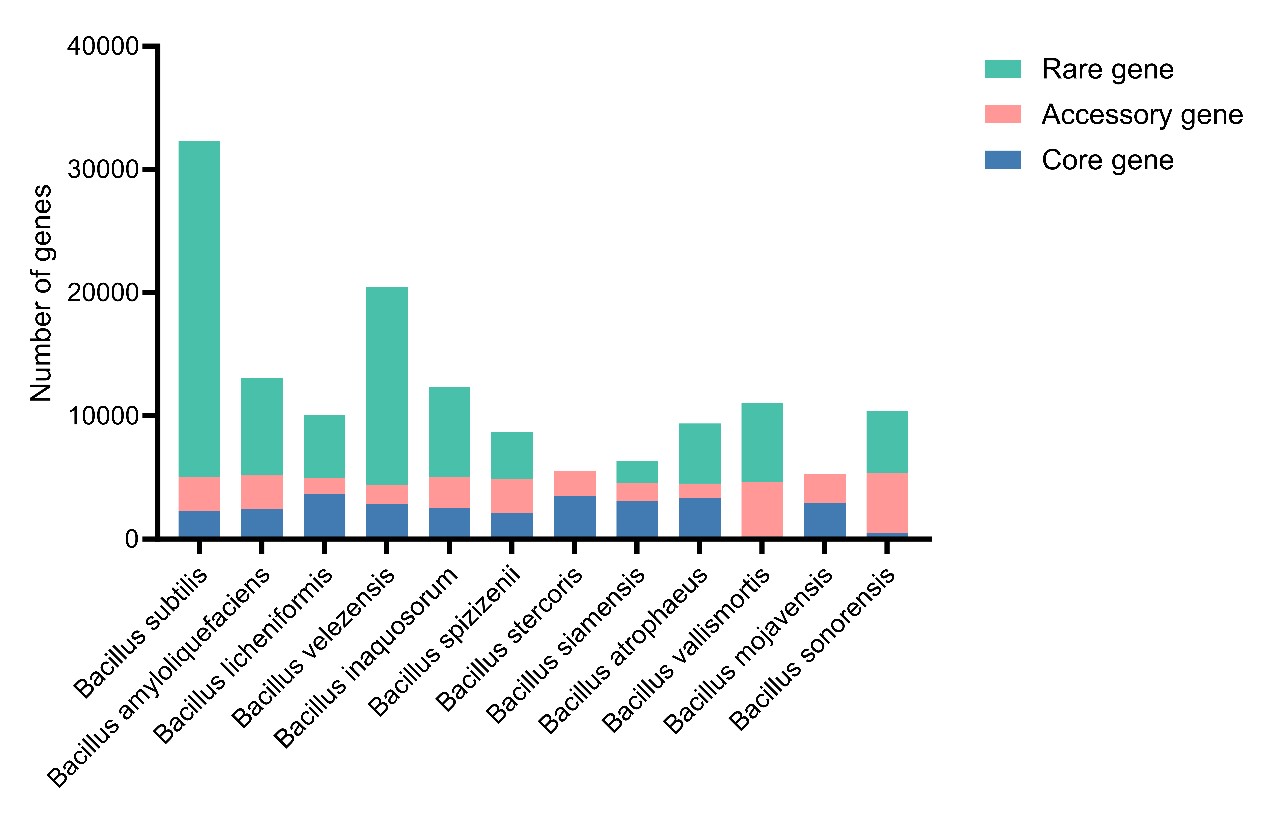


Fig1A


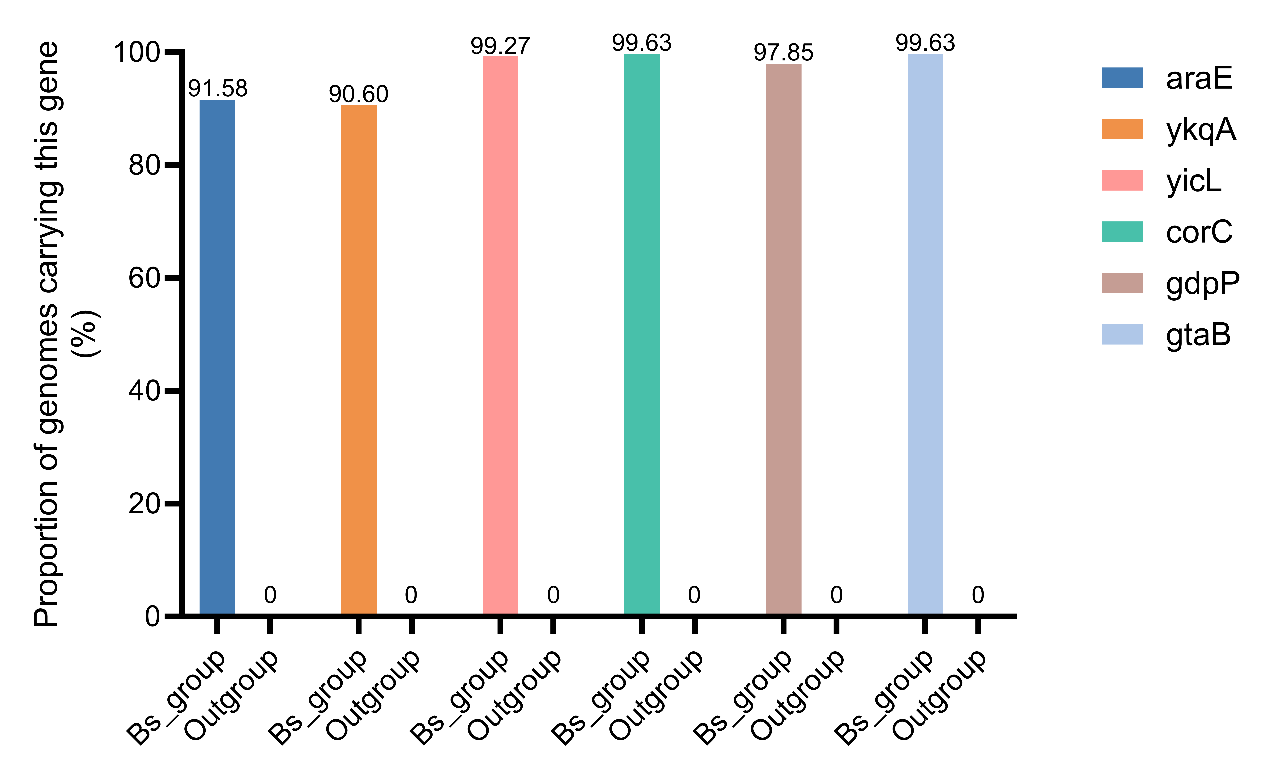


Fig1B


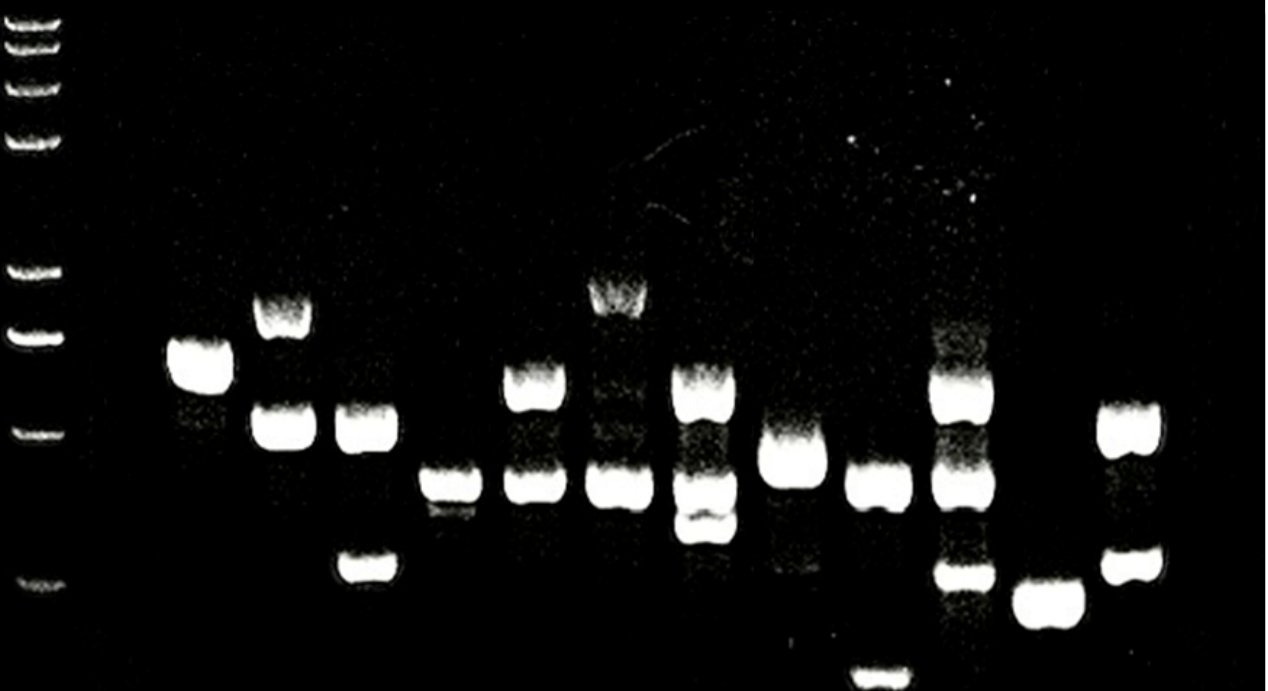


Fig2


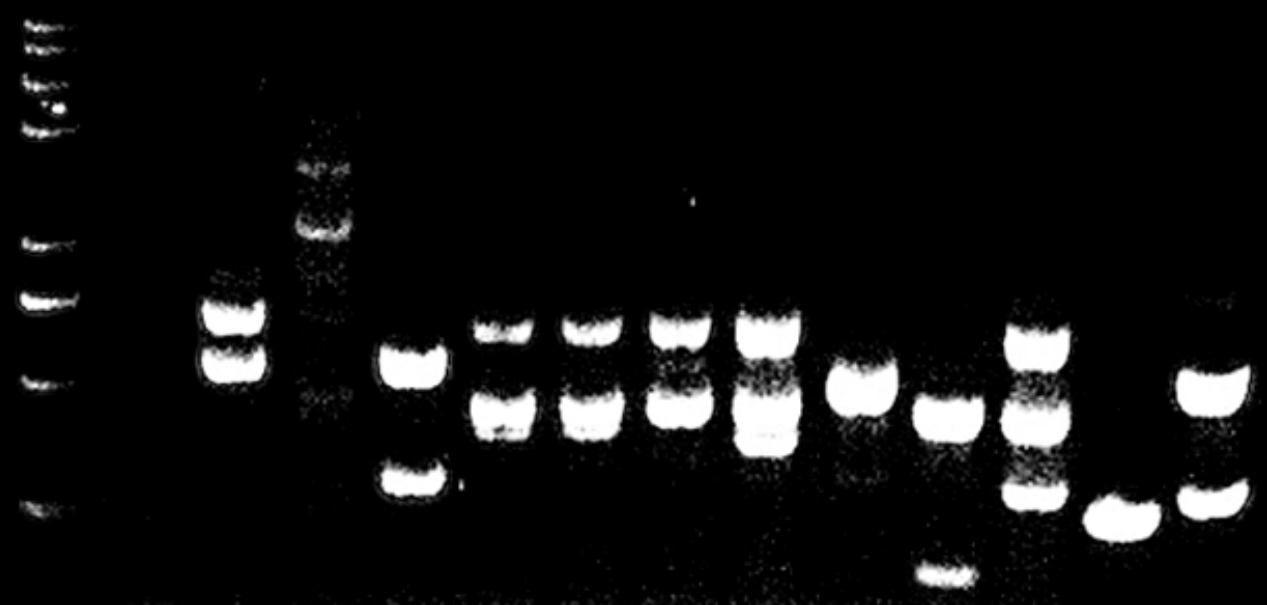


Fig3A


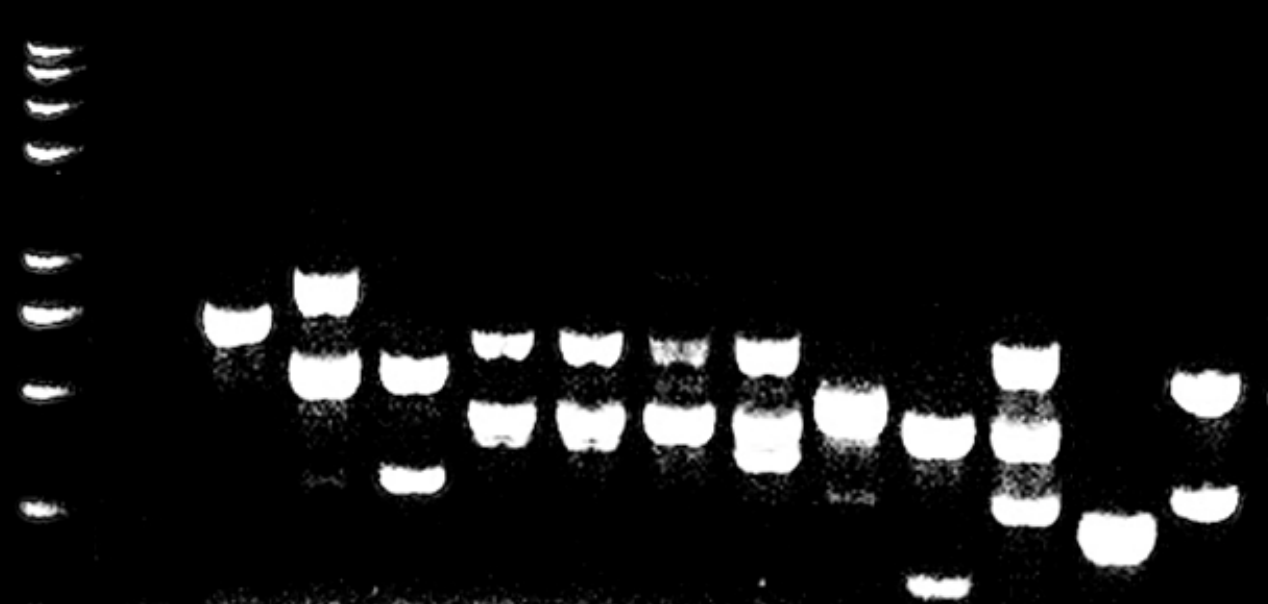


Fig3B


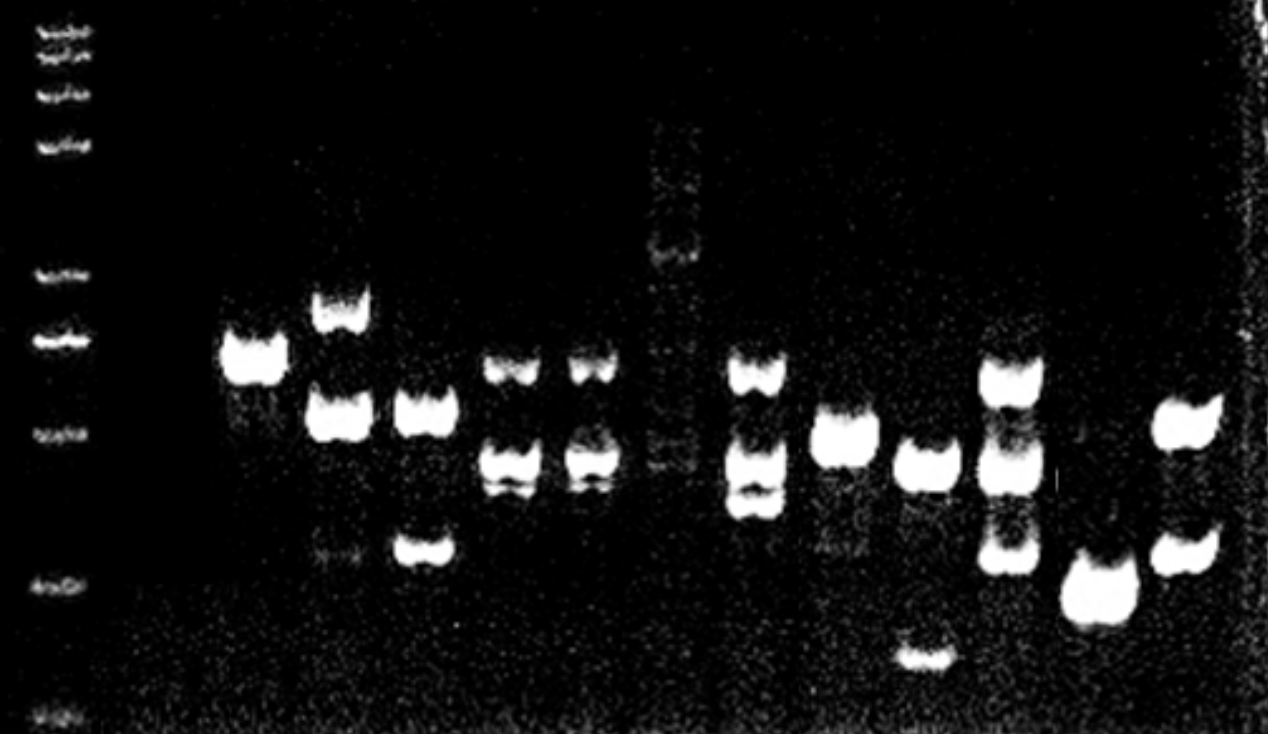


Fig3C


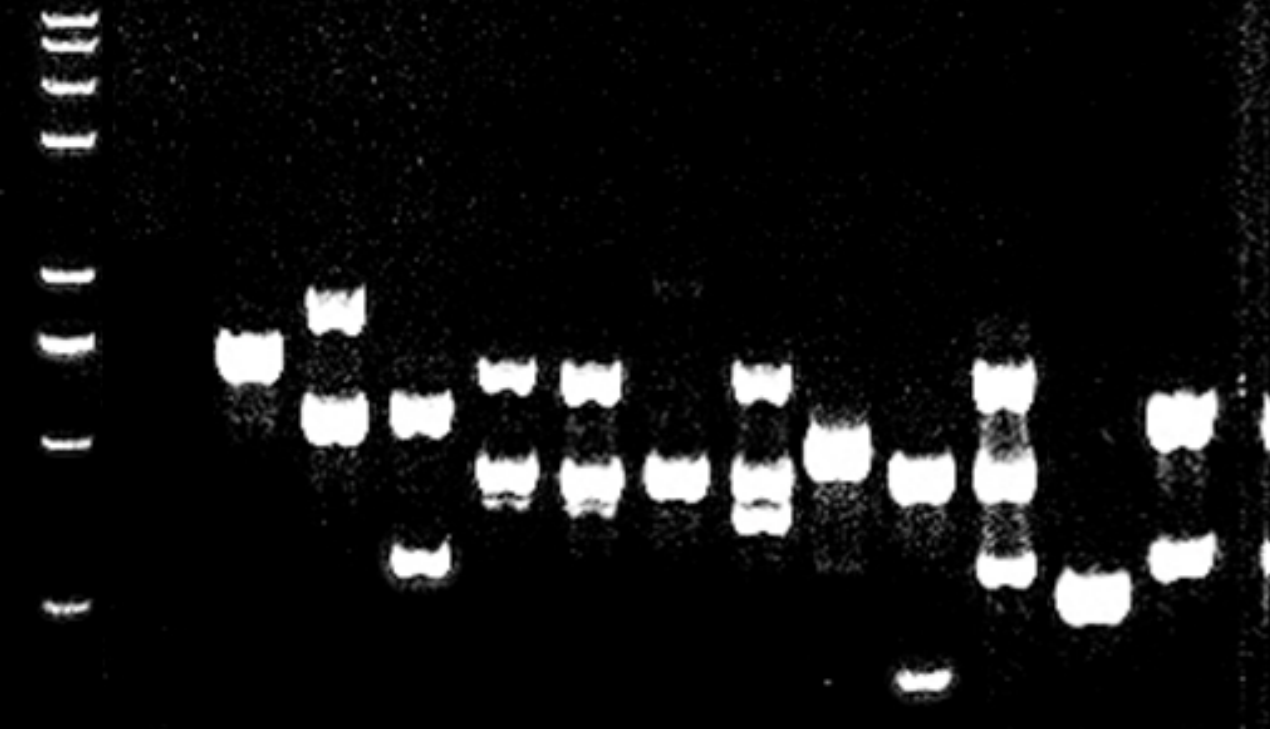


Fig3D


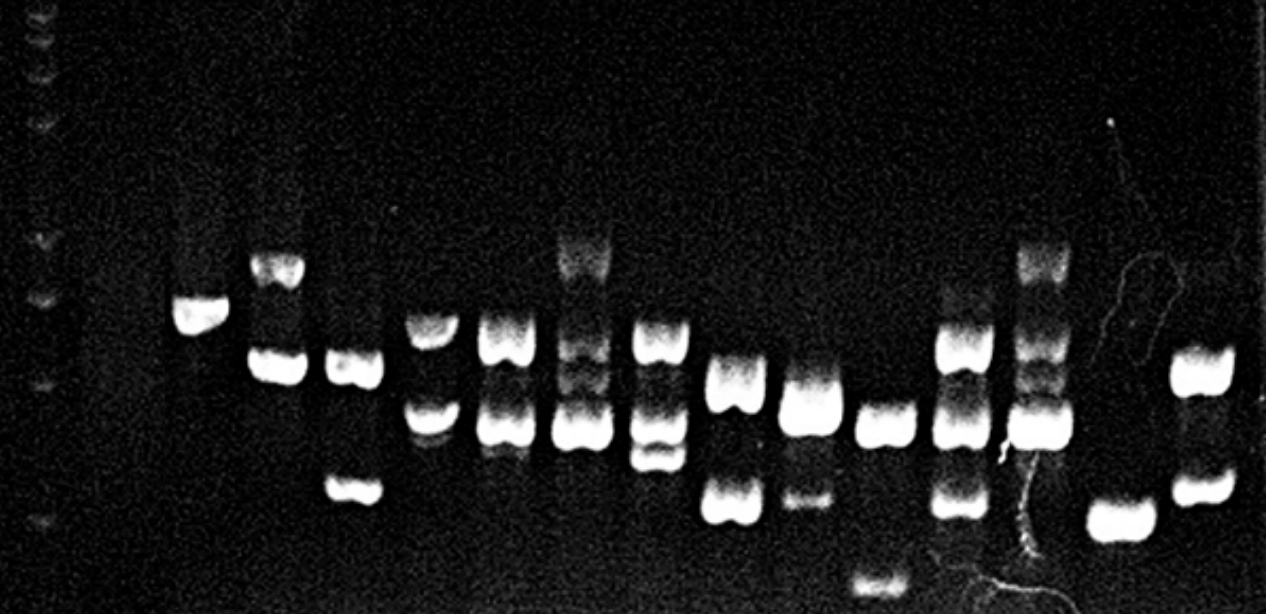


Fig3E


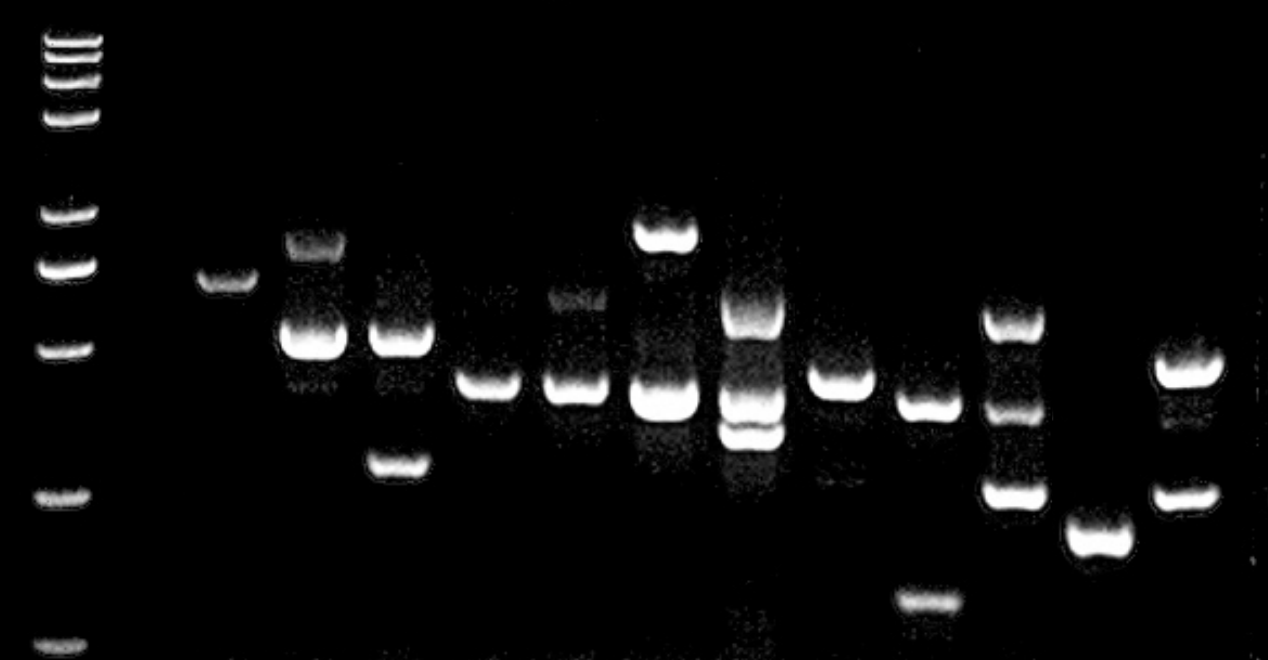


Fig3F


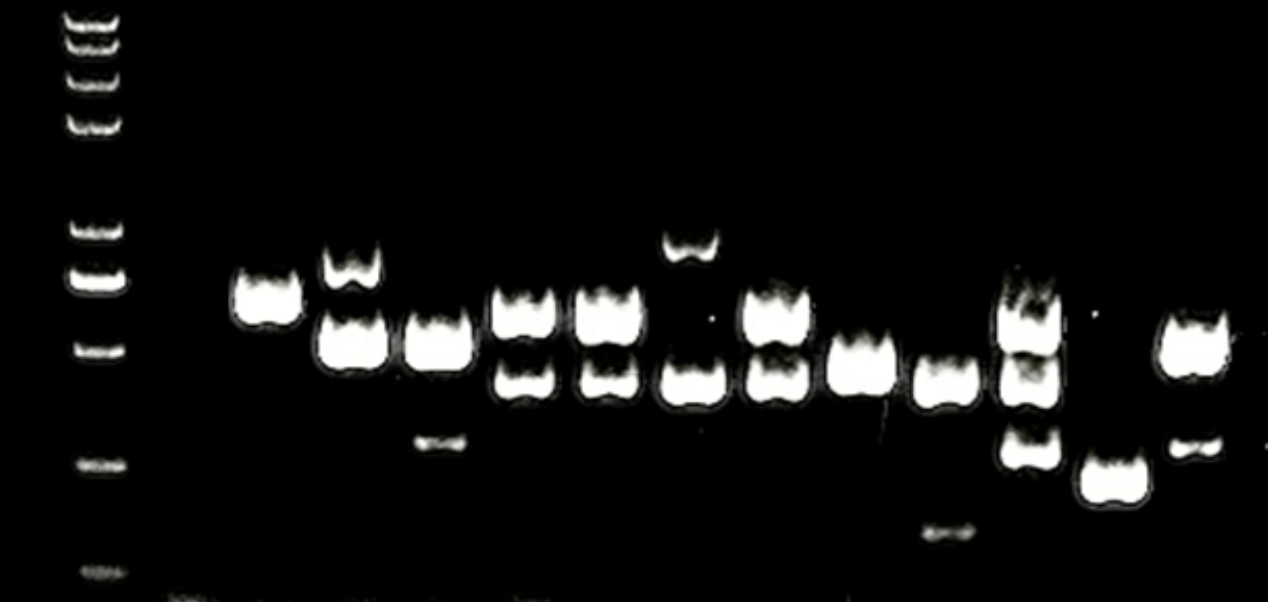


Fig3G


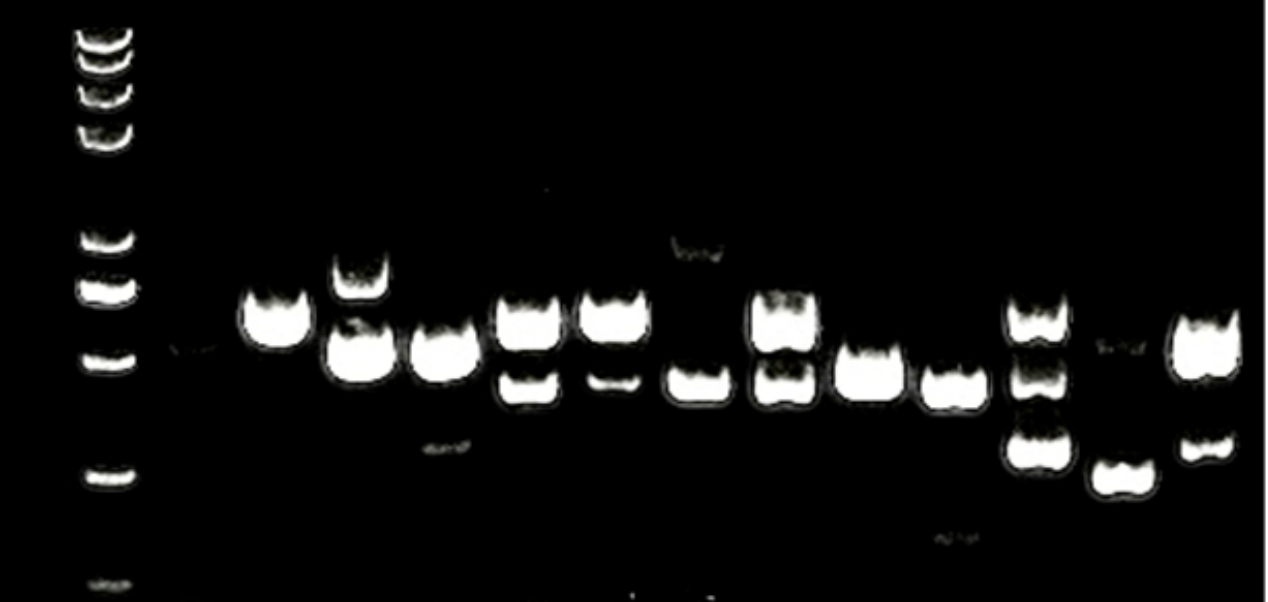


Fig3H


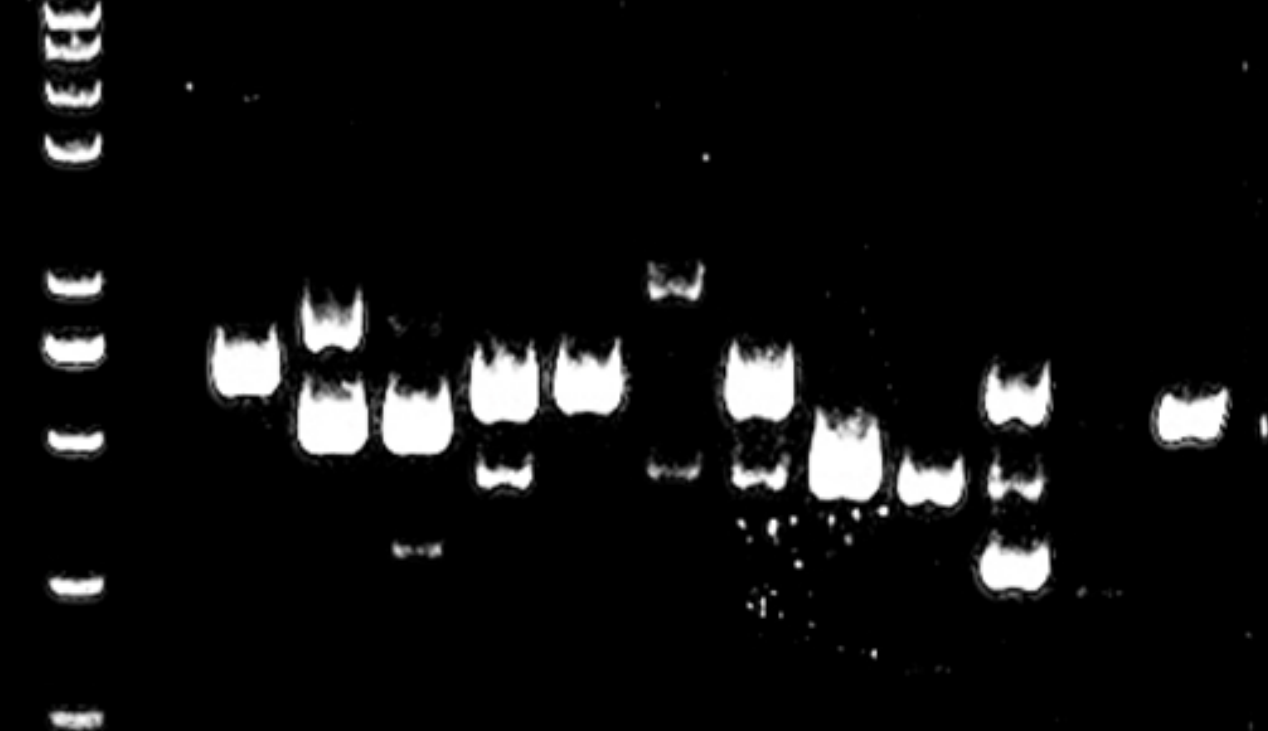


Fig3I


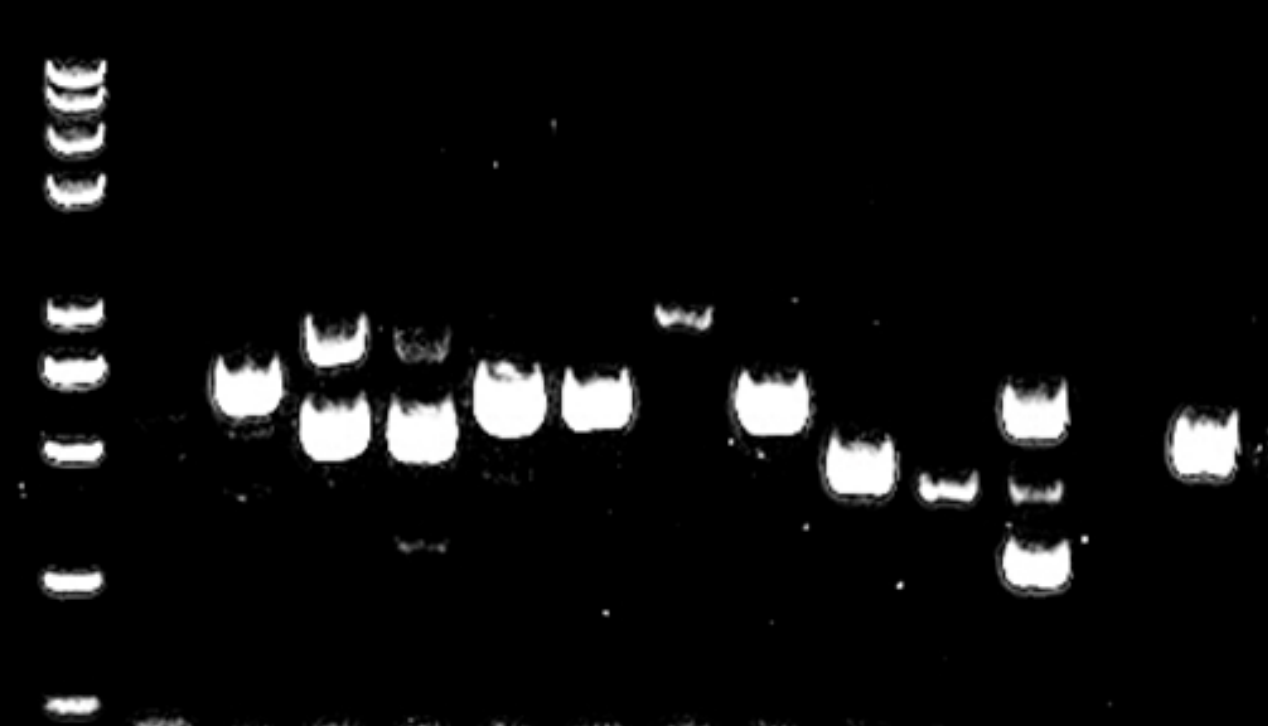


Fig3J


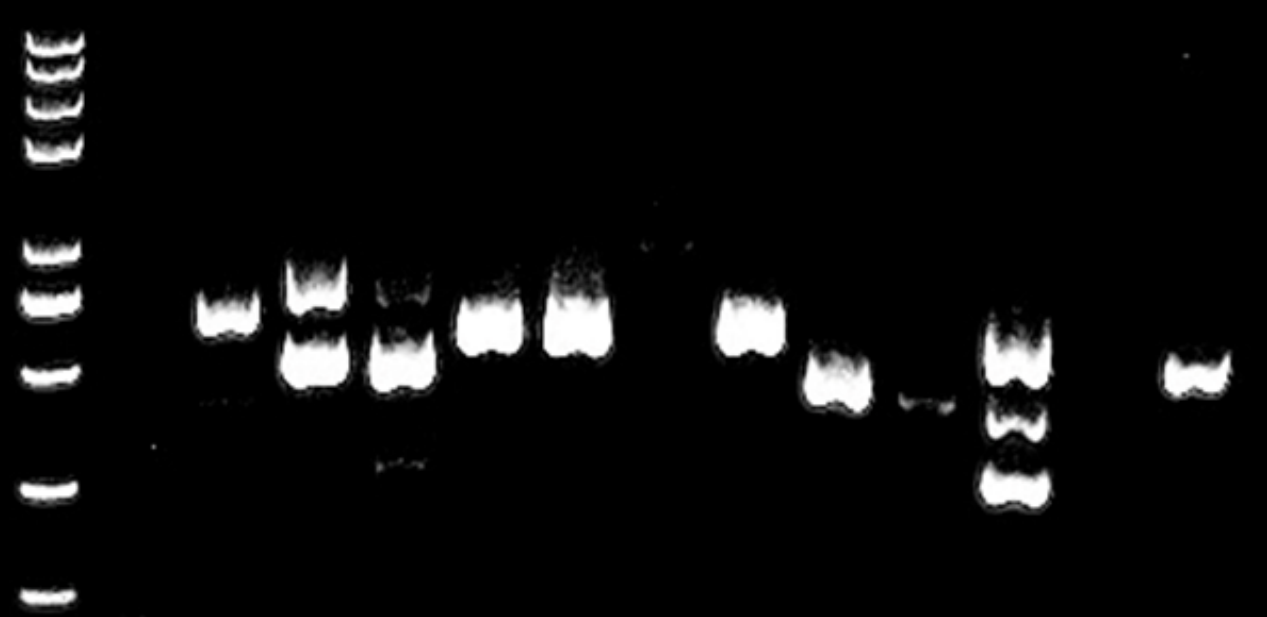


Fig3K


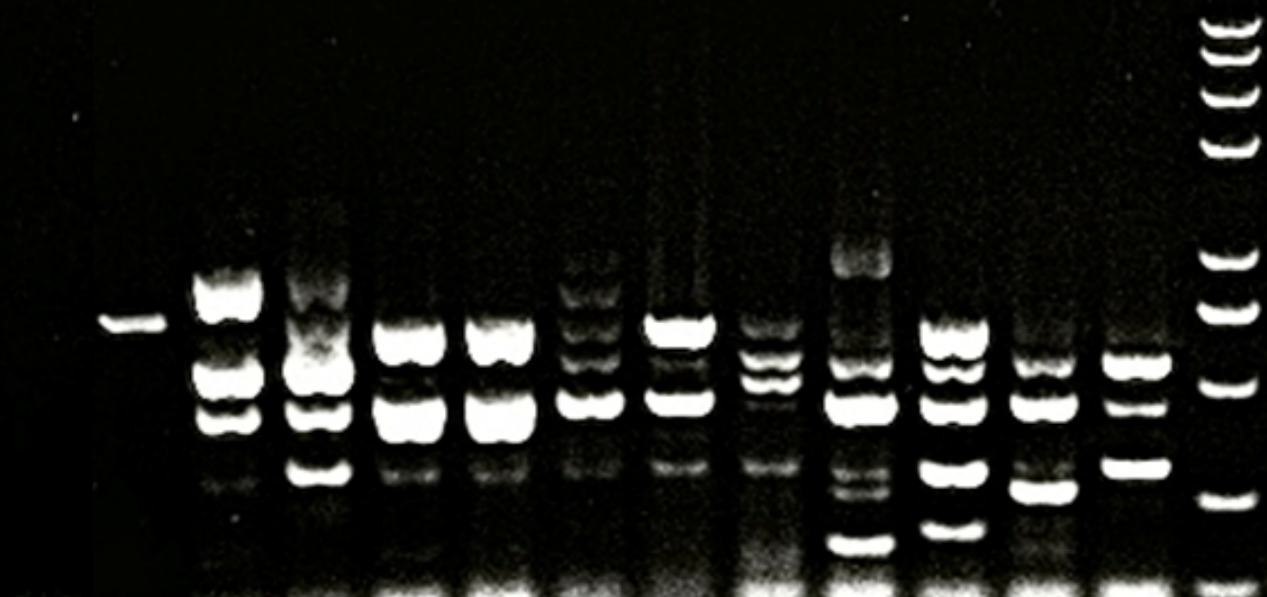


Fig4A


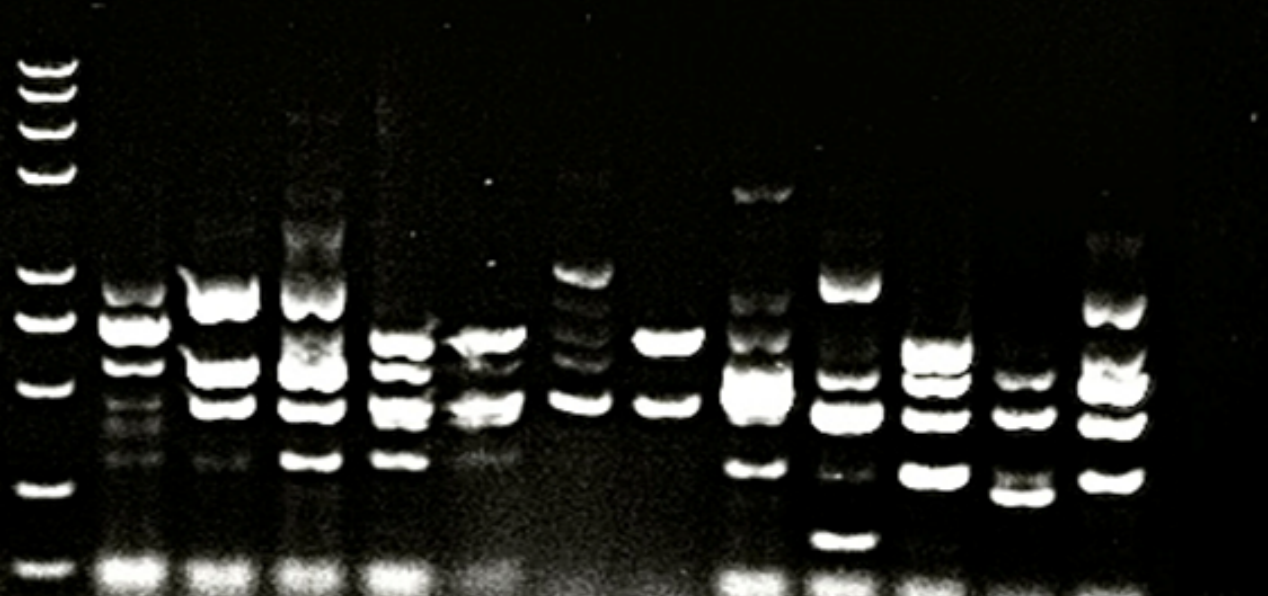


Fig4B


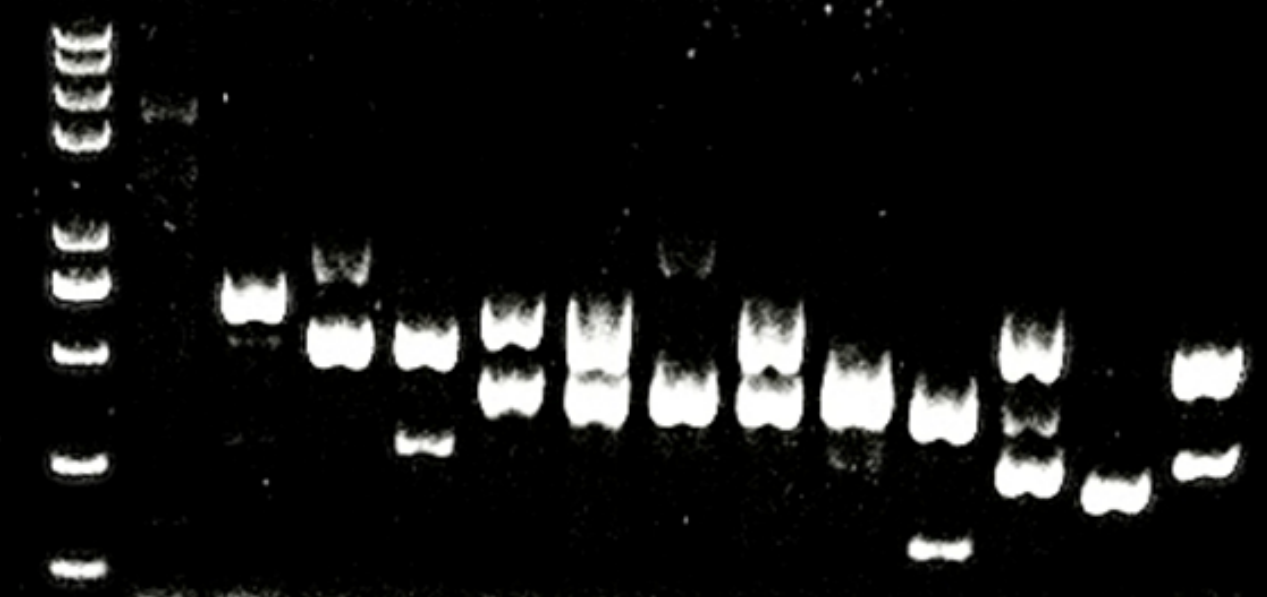


Fig4C


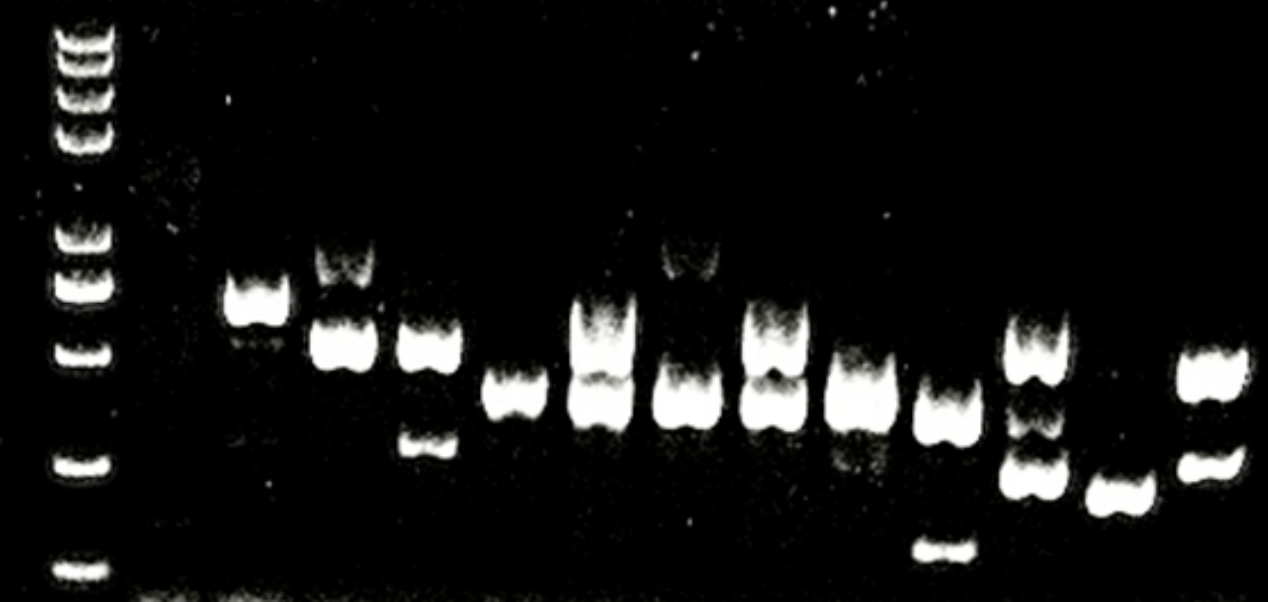


Fig4D


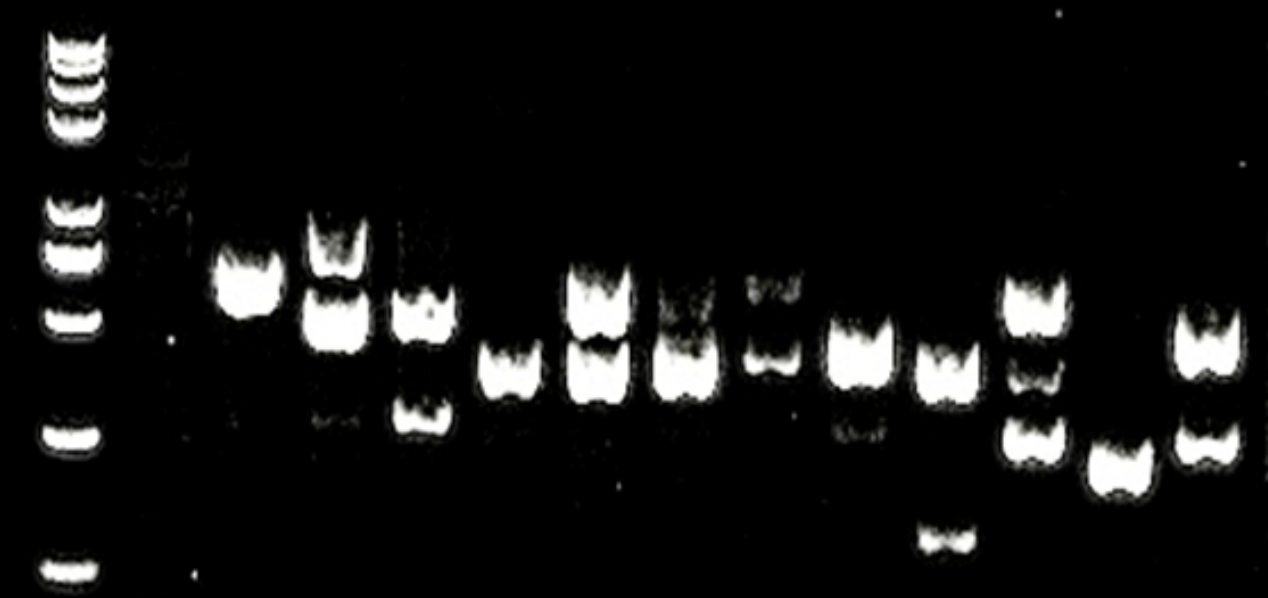


Fig4E


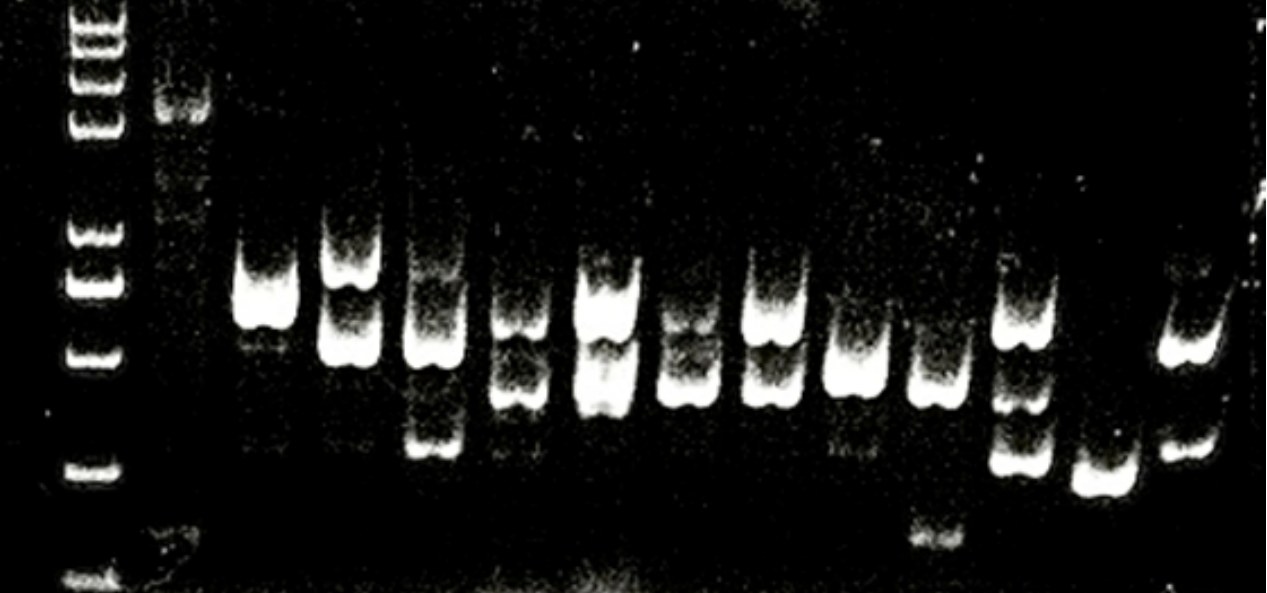


Fig4F


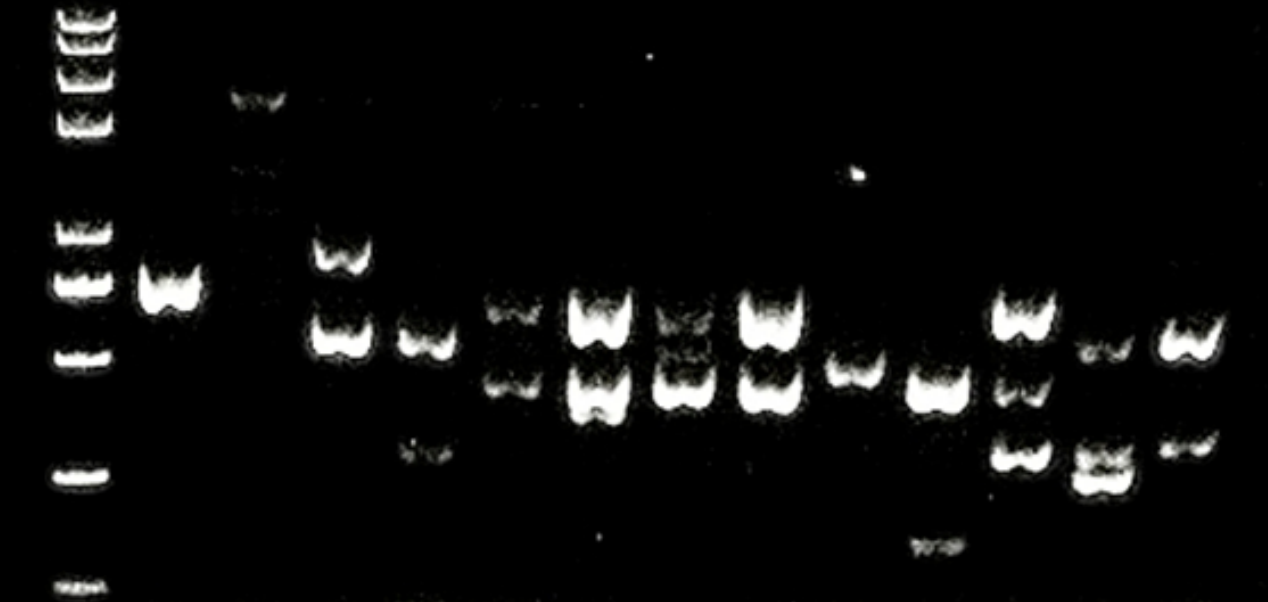


Fig4G


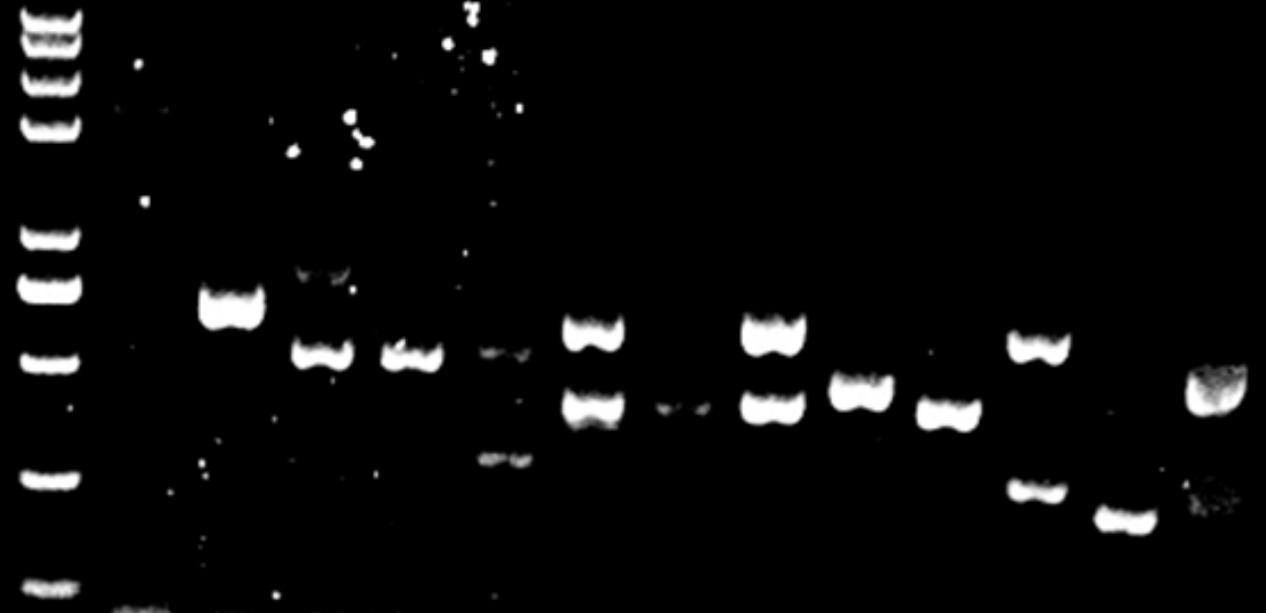


Fig4H


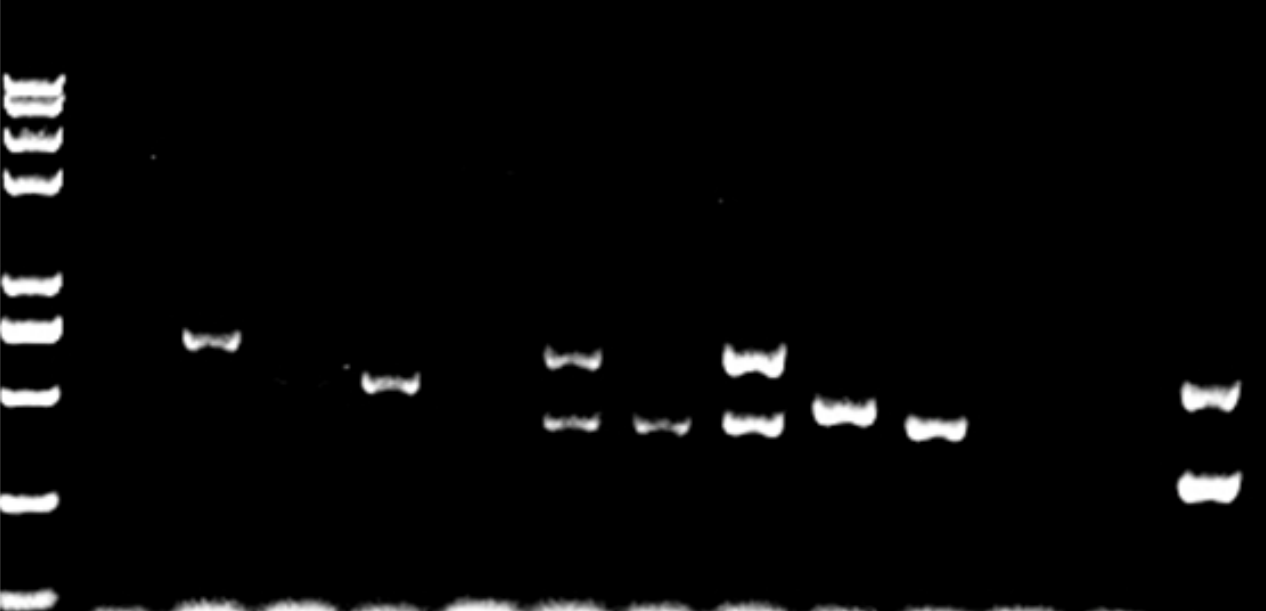


Fig4I
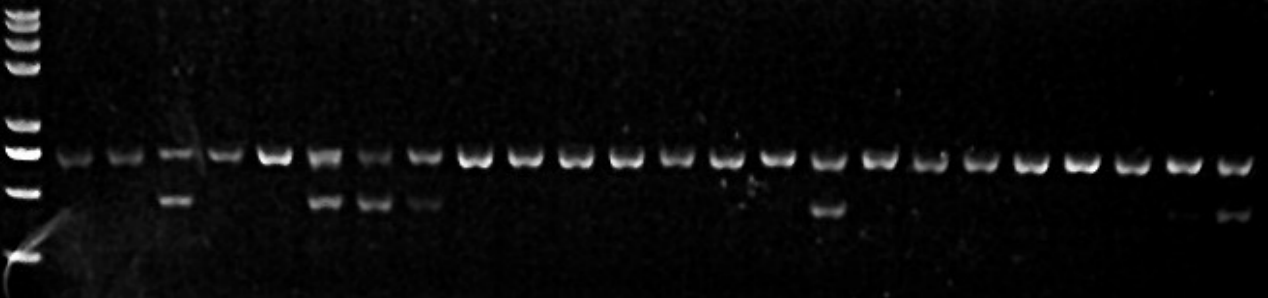


Fig5
